# Supplementary material for: Efficacy and safety of Chinese medicine JCM-16021 for diarrhea-predominant irritable bowel syndrome: study protocol for a multi-center, randomized, double-blind, placebo controlled clinical trial
Source: PubMed Central journal article supplement (PMC8590321; doi:10.1186/s13020-021-00530-2), 2021-11-13
Supplement: 13020_2021_530_MOESM2_ESM.pdf [file 13020_2021_530_MOESM2_ESM.pdf]

# The form, color, package, and lable of investigational manufactured products

| Drug   | Lable                                                                                                                                                                                                                                                                                                                                                                                                                                                                                                                                                                                                                                                                                                                                                                                                                                                                                                                                                                                                                                                                                                                                                                                                                                                                                                                                                     | Form<br>Color<br>Package                                                                                                                                                  |
|--------|-----------------------------------------------------------------------------------------------------------------------------------------------------------------------------------------------------------------------------------------------------------------------------------------------------------------------------------------------------------------------------------------------------------------------------------------------------------------------------------------------------------------------------------------------------------------------------------------------------------------------------------------------------------------------------------------------------------------------------------------------------------------------------------------------------------------------------------------------------------------------------------------------------------------------------------------------------------------------------------------------------------------------------------------------------------------------------------------------------------------------------------------------------------------------------------------------------------------------------------------------------------------------------------------------------------------------------------------------------------|---------------------------------------------------------------------------------------------------------------------------------------------------------------------------|
| 16021A | <p style="text-align: center;"><b>中藥治療IBS臨床研究用藥</b></p> <p style="text-align: center;"><b>【批號】 A1701687、A1801468</b></p> <p style="text-align: center;"><b>【規格】 每袋裝8g</b></p> <p style="text-align: center;"><b>培力（南寧）藥業有限公司</b></p> <hr/> <p style="text-align: center;">中藥治療 IBS 臨床研究用藥<br/><b>Traditional Chinese medicine treatment of IBS clinical research medication</b></p> <p><b>【用量】</b> 每日三次，每次一包，嚴格按照臨床研究方案服用。<br/><b>[Dosage]</b> Take one sachet three times daily in strictly according to the clinical research scheme.</p> <p><b>【用法】</b> 撕開小包，將顆粒放置容器中，加熱水攪拌至溶解後，即可服用。<br/><b>[Use]</b> Tear open the sachet, put the granules into a container, add hot water and stir until dissolved, then it can be used.</p> <p><b>【方向】</b> 將內容物倒置於杯中，加熱水攪拌至溶解。<br/><b>[Direction]</b> Empty the content of the sachet into a cup. Stir granule in hot water to dissolve.</p> <p><b>【儲存】</b> 置於陰涼乾燥處。<br/><b>[Storage]</b> Store in a cool and dry place.</p> <p><b>【生產批號】</b> A1701687、A1801468<br/><b>[Lot no.]</b> A1701687、A1801468</p> <p><b>【有效期】</b> 2020-01-10<br/><b>[Expiry date]</b> 2020-01-10</p> <p><b>【注意】</b> 避免兒童誤用；僅供臨床研究使用，返還剩餘藥物。<br/><b>[Caution]</b> Keep medicine out of reach of children. For clinical research use only, please return the remaining drug.</p> <p><b>【藥物編號】</b> 1602A<br/><b>[Drug number]</b> 1602A</p> |      |
| 16021B | <p style="text-align: center;"><b>中藥治療IBS臨床研究用藥</b></p> <p style="text-align: center;"><b>【批號】 A1701687、A1801468</b></p> <p style="text-align: center;"><b>【規格】 每袋裝8g</b></p> <p style="text-align: center;"><b>培力（南寧）藥業有限公司</b></p> <hr/> <p style="text-align: center;">中藥治療 IBS 臨床研究用藥<br/><b>Traditional Chinese medicine treatment of IBS clinical research medication</b></p> <p><b>【用量】</b> 每日三次，每次一包，嚴格按照臨床研究方案服用。<br/><b>[Dosage]</b> Take one sachet three times daily in strictly according to the clinical research scheme.</p> <p><b>【用法】</b> 撕開小包，將顆粒放置容器中，加熱水攪拌至溶解後，即可服用。<br/><b>[Use]</b> Tear open the sachet, put the granules into a container, add hot water and stir until dissolved, then it can be used.</p> <p><b>【方向】</b> 將內容物倒置於杯中，加熱水攪拌至溶解。<br/><b>[Direction]</b> Empty the content of the sachet into a cup. Stir granule in hot water to dissolve.</p> <p><b>【儲存】</b> 置於陰涼乾燥處。<br/><b>[Storage]</b> Store in a cool and dry place.</p> <p><b>【生產批號】</b> A1701687、A1801468<br/><b>[Lot no.]</b> A1701687、A1801468</p> <p><b>【有效期】</b> 2020-01-10<br/><b>[Expiry date]</b> 2020-01-10</p> <p><b>【注意】</b> 避免兒童誤用；僅供臨床研究使用，返還剩餘藥物。<br/><b>[Caution]</b> Keep medicine out of reach of children. For clinical research use only, please return the remaining drug.</p> <p><b>【藥物編號】</b> 1602B<br/><b>[Drug number]</b> 1602B</p> |   |
